# Supplementary material for: Hair Maintenance and Chemical Hair Product Usage as Barriers to Physical Activity in Childhood and Adulthood among African American Women
Source: MDPI journal article supplement (doi:10.3390/ijerph17249254), 2020-12-10
Supplement: s1 [file s1]

**Supplemental Table S1. Bivariate associations between chemical relaxer and leave-in conditioner use**

| Leave-in<br>Conditioner Use (%) | Chemical Relaxer Use (%) |           |              | Total<br>(%) |
|---------------------------------|--------------------------|-----------|--------------|--------------|
|                                 | ≥ Twice/Year             | Once/Year | Rarely/Never |              |
| ≥Once/Week                      | 7.0                      | 2.6       | 14.3         | 23.9         |
| 1-3 Times/Month                 | 5.0                      | 1.9       | 12.8         | 19.7         |
| Rarely/Never                    | 17.6                     | 7.3       | 31.5         | 56.4         |
| <b>Total (%)</b>                | 29.6                     | 11.8      | 58.6         | 100          |

X<sup>2</sup> p-value = 0.13

Supplemental Table S2. Adulthood characteristics of participants by adulthood chemical relaxer use, SELF, N=1,440\*

|                                             |  | Chemical Relaxer/Straightener Use |                    |                       |
|---------------------------------------------|--|-----------------------------------|--------------------|-----------------------|
|                                             |  | Mean ± SD or %                    |                    |                       |
|                                             |  | ≥ Twice/Year<br>n=426             | Once/Year<br>n=171 | Rarely/Never<br>n=843 |
| Sociodemographic Characteristics            |  |                                   |                    |                       |
| Age, years (mean ± SD)                      |  | 33 ± 3.3                          | 32 ± 3.6           | 33 ± 3.5              |
| Educational Attainment                      |  |                                   |                    |                       |
| ≤High School or GED                         |  | 16                                | 31                 | 12                    |
| Some College/Associate or Technical Degree  |  | 58                                | 50                 | 48                    |
| ≥ Bachelor's Degree                         |  | 26                                | 19                 | 40                    |
| Total Annual Household Income               |  |                                   |                    |                       |
| <\$20,000                                   |  | 40                                | 58                 | 29                    |
| \$20,000-\$50,000                           |  | 37                                | 29                 | 42                    |
| >\$50,000                                   |  | 23                                | 13                 | 29                    |
| Current Full- or Part-Time Employment (yes) |  | 77                                | 66                 | 81                    |
| Marital Status                              |  |                                   |                    |                       |
| Married/Living with Partner                 |  | 43                                | 34                 | 41                    |
| Divorced/Separated/Widowed                  |  | 19                                | 23                 | 19                    |
| Never Married                               |  | 39                                | 43                 | 40                    |
| Health Behaviors and Characteristics        |  |                                   |                    |                       |
| BMI (kg/mg <sup>2</sup> )                   |  |                                   |                    |                       |
| Underweight/Normal (<25.0)                  |  | 12                                | 18                 | 17                    |
| Overweight (25.0 to 29.9)                   |  | 20                                | 15                 | 20                    |
| Obese Class I (30.0-34.9)                   |  | 18                                | 17                 | 21                    |
| Obese Classes II and III (≥35.0)            |  | 50                                | 50                 | 42                    |
| Smoking Status                              |  |                                   |                    |                       |
| Never                                       |  | 63                                | 60                 | 75                    |
| Former                                      |  | 12                                | 8                  | 8                     |
| Current                                     |  | 25                                | 32                 | 17                    |
| Alcohol Use (Past 12 Months)                |  |                                   |                    |                       |
| None                                        |  | 12                                | 15                 | 15                    |
| Moderate                                    |  | 64                                | 58                 | 70                    |

|                                                                                                                                                                                 |    |    |    |
|---------------------------------------------------------------------------------------------------------------------------------------------------------------------------------|----|----|----|
| Heavy                                                                                                                                                                           | 24 | 26 | 15 |
| Good/Very Good/Excellent General Physical Health (Yes)                                                                                                                          | 82 | 83 | 86 |
| Enjoyment of Physical Activity                                                                                                                                                  |    |    |    |
| Not at All/ A Little/ Somewhat                                                                                                                                                  | 60 | 51 | 56 |
| Quite a Bit/Very Much                                                                                                                                                           | 40 | 49 | 44 |
| <b>Physical Activity (PA) in the Past 12 Months</b>                                                                                                                             |    |    |    |
| Participation in regular leisure time PA (sports, took exercise class/did other activities (e.g., biking, hiking, dancing)) (yes)                                               | 53 | 57 | 62 |
| ≥150 Minutes/Week of Regular Leisure-time Physical Activity (not including walking) (yes)                                                                                       | 26 | 32 | 32 |
| Percentage of Time Spent Engaging in Intense Physical Activity **                                                                                                               |    |    |    |
| > Half                                                                                                                                                                          | 33 | 33 | 48 |
| ≤ Half                                                                                                                                                                          | 52 | 54 | 40 |
| Very Little/None                                                                                                                                                                | 15 | 14 | 12 |
| Abbreviations: SELF (Study of Environment, Lifestyle and Fibroids); SD (Standard Deviation); GED (General Education Development); BMI (Body Mass Index); PA (Physical Activity) |    |    |    |
| Note: Percentages may not sum to 100 due to missing values and rounding.                                                                                                        |    |    |    |
| Missing Values: educational attainment= 1; household income= 2; general health= 9                                                                                               |    |    |    |
| *118 of the 1,558 participants were lost to follow-up and did not provide adulthood PA data.                                                                                    |    |    |    |
| ** Percentage of time spent engaging in intense PA was assessed among the 817 participants who engaged in any minutes of PA per week, on average.                               |    |    |    |

Supplemental Table S3. Adulthood characteristics of participants by adulthood leave-in conditioner use, SELF, N=1,440\*

|                                             |  | Leave-in Conditioner Use<br>Mean ± SD or % |                          |                       |
|---------------------------------------------|--|--------------------------------------------|--------------------------|-----------------------|
|                                             |  | ≥ Once/Week<br>n=345                       | 1-3 Times/Month<br>n=284 | Rarely/Never<br>n=811 |
| Sociodemographic Characteristics            |  |                                            |                          |                       |
| Age, years (mean ± SD)                      |  | 33 ± 3.3                                   | 33 ± 3.4                 | 32 ± 3.5              |
| Educational Attainment                      |  |                                            |                          |                       |
| ≤High School or GED                         |  | 10                                         | 9                        | 20                    |
| Some College/Associate or Technical Degree  |  | 50                                         | 50                       | 52                    |
| ≥ Bachelor's Degree                         |  | 40                                         | 41                       | 28                    |
| Total Annual Household Income               |  |                                            |                          |                       |
| <\$20,000                                   |  | 31                                         | 27                       | 40                    |
| \$20,000-\$50,000                           |  | 41                                         | 43                       | 37                    |
| >\$50,000                                   |  | 28                                         | 30                       | 23                    |
| Current Full- or Part-Time Employment (yes) |  | 77                                         | 85                       | 76                    |
| Marital Status                              |  |                                            |                          |                       |
| Married/Living with Partner                 |  | 38                                         | 43                       | 41                    |
| Divorced/Separated/Widowed                  |  | 23                                         | 19                       | 18                    |
| Never Married                               |  | 40                                         | 38                       | 41                    |
| Health Behaviors and Characteristics        |  |                                            |                          |                       |
| BMI (kg/mg <sup>2</sup> )                   |  |                                            |                          |                       |
| Underweight/Normal (<25.0)                  |  | 13                                         | 18                       | 16                    |
| Overweight (25.0 to 29.9)                   |  | 21                                         | 21                       | 18                    |
| Obese Class I (30.0-34.9)                   |  | 23                                         | 22                       | 18                    |
| Obese Classes II and III (≥35.0)            |  | 43                                         | 39                       | 48                    |
| Smoking Status                              |  |                                            |                          |                       |
| Never                                       |  | 73                                         | 76                       | 66                    |
| Former                                      |  | 7                                          | 10                       | 10                    |
| Current                                     |  | 20                                         | 13                       | 24                    |
| Alcohol Use (Past 12 Months)                |  |                                            |                          |                       |
| None                                        |  | 12                                         | 12                       | 16                    |
| Moderate                                    |  | 68                                         | 75                       | 63                    |

|                                                        |    |    |    |
|--------------------------------------------------------|----|----|----|
| Heavy                                                  | 20 | 12 | 21 |
| Good/Very Good/Excellent General Physical Health (Yes) | 86 | 85 | 84 |
| Enjoyment of Physical Activity                         |    |    |    |
| Not at All/ A Little/ Somewhat                         | 55 | 57 | 57 |
| Quite a Bit/Very Much                                  | 45 | 43 | 43 |

**Physical Activity (PA) in the Past 12 Months**

|                                                                                                                                   |    |    |    |
|-----------------------------------------------------------------------------------------------------------------------------------|----|----|----|
| Participation in regular leisure time PA (sports, took exercise class/did other activities (e.g., biking, hiking, dancing)) (yes) | 63 | 64 | 55 |
| ≥150 Minutes/Week of Regular Leisure-time Physical Activity (not including walking) (yes)                                         | 34 | 35 | 27 |
| Percentage of Time Spent Engaging in Intense Physical Activity **                                                                 |    |    |    |
| > Half                                                                                                                            | 49 | 43 | 39 |
| ≤ Half                                                                                                                            | 43 | 45 | 45 |
| Very Little/None                                                                                                                  | 8  | 11 | 16 |

Abbreviations: SELF (Study of Environment, Lifestyle, and Fibroids); SD (Standard Deviation); GED (General Education Development); BMI (Body Mass Index); PA (Physical Activity)

Note: Percentages may not sum to 100 due to missing values and rounding.

Missing Values: educational attainment= 1; household income= 2; general health= 9

\*118 of the 1,558 participants were lost to follow-up and did not provide adulthood PA data.

\*\* Percentage of time spent engaging in intense PA was assessed among the 817 participants who engaged in any minutes of PA per week, on average.

| Supplemental Table S4. Adulthood characteristics of participants by latent class of hair maintenance behaviors/hair product use in adulthood, SELF, N=1,440* |  |                                                                                   |                  |                  |
|--------------------------------------------------------------------------------------------------------------------------------------------------------------|--|-----------------------------------------------------------------------------------|------------------|------------------|
|                                                                                                                                                              |  | Latent Class of Hair Maintenance Behaviors/<br>Hair Product Use<br>Mean ± SD or % |                  |                  |
|                                                                                                                                                              |  | Class 1<br>n=512                                                                  | Class 2<br>n=485 | Class 3<br>n=443 |
| <b>Sociodemographic Characteristics</b>                                                                                                                      |  |                                                                                   |                  |                  |
| Age, years (mean ± SD)                                                                                                                                       |  | 33 ± 3.5                                                                          | 32 ± 3.4         | 32 ± 3.3         |
| Educational Attainment                                                                                                                                       |  |                                                                                   |                  |                  |
| ≤High School or GED                                                                                                                                          |  | 22                                                                                | 10               | 13               |
| Some College/Associate or Technical Degree                                                                                                                   |  | 52                                                                                | 51               | 51               |
| ≥ Bachelor's Degree                                                                                                                                          |  | 26                                                                                | 38               | 36               |
| Total Annual Household Income                                                                                                                                |  |                                                                                   |                  |                  |
| <\$20,000                                                                                                                                                    |  | 43                                                                                | 28               | 36               |
| \$20,000-\$50,000                                                                                                                                            |  | 36                                                                                | 44               | 37               |
| >\$50,000                                                                                                                                                    |  | 21                                                                                | 28               | 28               |
| Current Full- or Part-Time Employment (yes)                                                                                                                  |  | 74                                                                                | 83               | 76               |
| Marital Status                                                                                                                                               |  |                                                                                   |                  |                  |
| Married/Living with Partner                                                                                                                                  |  | 40                                                                                | 42               | 40               |
| Divorced/Separated/Widowed                                                                                                                                   |  | 18                                                                                | 19               | 21               |
| Never Married                                                                                                                                                |  | 42                                                                                | 39               | 39               |
| <b>Health Behaviors and Characteristics</b>                                                                                                                  |  |                                                                                   |                  |                  |
| BMI (kg/mg <sup>2</sup> )                                                                                                                                    |  |                                                                                   |                  |                  |
| Underweight/Normal (<25.0)                                                                                                                                   |  | 16                                                                                | 17               | 13               |
| Overweight (25.0 to 29.9)                                                                                                                                    |  | 19                                                                                | 19               | 20               |
| Obese Class I (30.0-34.9)                                                                                                                                    |  | 20                                                                                | 19               | 20               |
| Obese Classes II and III (≥35.0)                                                                                                                             |  | 45                                                                                | 44               | 47               |
| Smoking Status                                                                                                                                               |  |                                                                                   |                  |                  |
| Never                                                                                                                                                        |  | 64                                                                                | 75               | 70               |
| Former                                                                                                                                                       |  | 8                                                                                 | 10               | 9                |
| Current                                                                                                                                                      |  | 27                                                                                | 15               | 21               |
| Alcohol Use (Past 12 Months)                                                                                                                                 |  |                                                                                   |                  |                  |
| None                                                                                                                                                         |  | 17                                                                                | 12               | 14               |

|                                                                                                                                   |    |    |    |
|-----------------------------------------------------------------------------------------------------------------------------------|----|----|----|
| Moderate                                                                                                                          | 61 | 74 | 66 |
| Heavy                                                                                                                             | 22 | 14 | 21 |
| Good/Very Good/Excellent General Physical Health (Yes)                                                                            | 83 | 87 | 84 |
| Enjoyment of Physical Activity                                                                                                    |    |    |    |
| Not at All/ A Little/ Somewhat                                                                                                    | 56 | 58 | 54 |
| Quite a Bit/Very Much                                                                                                             | 44 | 42 | 46 |
| <b>Physical Activity (PA) in the Past 12 Months</b>                                                                               |    |    |    |
| Participation in regular leisure time PA (sports, took exercise class/did other activities (e.g., biking, hiking, dancing)) (yes) | 54 | 62 | 62 |
| ≥150 Minutes/Week of Regular Leisure-time Physical Activity (not including walking) (yes)                                         | 26 | 32 | 35 |
| Percentage of Time Spent Engaging in Intense Physical Activity **                                                                 |    |    |    |
| > Half                                                                                                                            | 37 | 43 | 48 |
| ≤ Half                                                                                                                            | 47 | 45 | 42 |
| Very Little/None                                                                                                                  | 16 | 13 | 11 |

Abbreviations: SELF (Study of Environment, Lifestyle, and Fibroids); SD (Standard Deviation); GED (General Education Development); BMI (Body Mass Index); PA (Physical Activity)

Note: Percentages may not sum to 100 due to missing values and rounding.

Class 1: High Styling Product Use/ Low Use Other Products

Class 2: High Styling Product Use/ Medium Shampoo & Conditioners

Class 3: High Styling Product, Growth/Moisturizing Product, and Shampoo Use

Missing Values: educational attainment= 1; household income= 2; general health= 9

\*118 of the 1,558 participants were lost to follow-up and did not provide adulthood PA data.

\*\* Percentage of time spent engaging in intense PA was assessed among the 817 participants who engaged in any minutes of PA per week, on average.

**Supplemental Table S5. Prevalence ratios for engagement in physical activity (PA) for participants by chemical hair product use or latent class of hair maintenance behaviors in the past 12 months, stratified by enjoyment of PA: Participants with more hair product use/hair maintenance compared to participants with less hair product use/hair maintenance, Study of Environment, Lifestyle and Fibroids (N=1,440\*)**

| Chemical Hair Product OR<br>Latent Classes of<br>Hair Maintenance Behaviors/<br>Hair Product Use | Enjoyment of PA (Quite a Bit/Very Much)             |                         |                                                         |                  |                                                                                        |                  |                                                                                        |                  |
|--------------------------------------------------------------------------------------------------|-----------------------------------------------------|-------------------------|---------------------------------------------------------|------------------|----------------------------------------------------------------------------------------|------------------|----------------------------------------------------------------------------------------|------------------|
|                                                                                                  | No<br>(n=812)                                       | Yes<br>(n=628)          | No<br>(n=812)                                           | Yes<br>(n=628)   | No<br>(n=229)                                                                          | Yes<br>(n=241)   | No<br>(n=195)                                                                          | Yes<br>(n=258)   |
|                                                                                                  | Prevalence Ratio (95% CI)                           |                         |                                                         |                  |                                                                                        |                  |                                                                                        |                  |
|                                                                                                  | Participation in<br>Leisure-time PA<br>(Yes vs. No) |                         | ≥150 Minutes/Week of<br>Leisure-time PA<br>(Yes vs. No) |                  | Percentage of Time Spent<br>Engaging in Intense PA **<br>(≤ Half vs. Very Little/None) |                  | Percentage of Time Spent<br>Engaging in Intense PA **<br>(> Half vs. Very Little/None) |                  |
| <b>Chemical Relaxer</b>                                                                          |                                                     |                         |                                                         |                  |                                                                                        |                  |                                                                                        |                  |
| ≥ Twice/Year vs. Rarely/Never                                                                    | 0.85 (0.72-1.01)                                    | 0.95 (0.85-1.06)        | 0.75 (0.54-1.04)                                        | 1.01 (0.82-1.25) | 0.95 (0.80-1.13)                                                                       | 1.04 (0.91-1.19) | 0.88 (0.70-1.11)                                                                       | 0.92 (0.80-1.06) |
| Once/Year vs. Rarely/Never                                                                       | 0.92 (0.71-1.18)                                    | 1.05 (0.91-1.22)        | 0.97 (0.62-1.54)                                        | 1.14 (0.87-1.48) | 1.14 (0.92-1.42)                                                                       | 1.11 (0.92-1.35) | 1.13 (0.82-1.57)                                                                       | 0.98 (0.80-1.20) |
| <b>Leave-in Conditioner</b>                                                                      |                                                     |                         |                                                         |                  |                                                                                        |                  |                                                                                        |                  |
| ≥Once/Week vs. Rarely/Never                                                                      | 0.99 (0.83-1.19)                                    | <b>1.14 (1.03-1.26)</b> | 1.00 (0.72-1.40)                                        | 1.17 (0.95-1.43) | 1.03 (0.87-1.22)                                                                       | 1.06 (0.93-1.22) | 0.98 (0.81-1.18)                                                                       | 1.10 (0.98-1.23) |
| 1-3 Times/Month vs. Rarely/Never                                                                 | 1.10 (0.93-1.31)                                    | 1.06 (0.94-1.19)        | 1.18 (0.86-1.63)                                        | 1.16 (0.93-1.46) | 0.97 (0.81-1.16)                                                                       | 1.05 (0.90-1.23) | 1.05 (0.86-1.27)                                                                       | 1.06 (0.91-1.24) |
| <b>Latent Classes</b>                                                                            |                                                     |                         |                                                         |                  |                                                                                        |                  |                                                                                        |                  |
| Class 3 vs. Class 1                                                                              | 1.10 (0.91-1.33)                                    | 1.06 (0.95-1.18)        | 1.24 (0.88-1.76)                                        | 1.18 (0.95-1.48) | 0.91 (0.76-1.10)                                                                       | 1.04 (0.89-1.21) | 1.04 (0.85-1.28)                                                                       | 1.07 (0.93-1.23) |
| Class 2 vs. Class 1                                                                              | 1.13 (0.95-1.36)                                    | 1.01 (0.90-1.14)        | 1.07 (0.76-1.52)                                        | 1.17 (0.93-1.47) | 0.91 (0.77-1.08)                                                                       | 1.11 (0.96-1.28) | 0.94 (0.76-1.16)                                                                       | 1.12 (0.97-1.29) |

Models are adjusted for sociodemographic factors (age, educational attainment, household income, employment status, marital status), and health behaviors/characteristics (smoking status, alcohol usage, body mass index category).

Bolded values indicate statistical significance at a two-sided p-value < 0.05.

Class 1: High Styling Product Use/ Low Use Other Products

Class 2: High Styling Product Use/ Medium Shampoo & Conditioners

Class 3: High Styling Product, Growth/Moisturizing Product, and Shampoo Use

Abbreviations: CI (Confidence Interval); PA (physical activity)

Missing values: educational attainment= 1; household income= 3

\* 118 of the 1,558 participants were lost to follow-up and did not provide adulthood PA data.

\*\* Percentage of time spent engaging in intense PA was assessed among the 817 participants who engaged in any minutes of PA per week, on average.

Note: No interaction terms had a two-sided p-value <0.10.



**Supplemental Table S6. Prevalence ratios for engagement in physical activity (PA) for participants by chemical hair product use or latent class of hair maintenance behaviors in the past 12 months, stratified by chemical relaxer use: Participants with more hair product use/hair maintenance compared to participants with less hair product use/hair maintenance, Study of Environment, Lifestyle and Fibroids (N=1,440\*)**

| Chemical Hair Product OR<br>Latent Classes of<br>Hair Maintenance Behaviors/<br>Hair Product Use | Chemical Relaxer Use                                |                  |                                                         |                  |                                                                                        |                  |                                                                                        |                  |
|--------------------------------------------------------------------------------------------------|-----------------------------------------------------|------------------|---------------------------------------------------------|------------------|----------------------------------------------------------------------------------------|------------------|----------------------------------------------------------------------------------------|------------------|
|                                                                                                  | No<br>(n=843)                                       | Yes<br>(n=597)   | No<br>(n=843)                                           | Yes<br>(n=597)   | No<br>(n=263)                                                                          | Yes<br>(n=207)   | No<br>(n=306)                                                                          | Yes<br>(n=147)   |
|                                                                                                  | Prevalence Ratio (95% CI)                           |                  |                                                         |                  |                                                                                        |                  |                                                                                        |                  |
|                                                                                                  | Participation in<br>Leisure-time PA<br>(Yes vs. No) |                  | ≥150 Minutes/Week of<br>Leisure-time PA<br>(Yes vs. No) |                  | Percentage of Time Spent<br>Engaging in Intense PA **<br>(≤ Half vs. Very Little/None) |                  | Percentage of Time Spent<br>Engaging in Intense PA **<br>(> Half vs. Very Little/None) |                  |
| Leave-in Conditioner                                                                             |                                                     |                  |                                                         |                  |                                                                                        |                  |                                                                                        |                  |
| ≥Once/Week vs. Rarely/Never                                                                      | 1.05 (0.93-1.18)                                    | 1.12 (0.95-1.31) | 1.14 (0.91-1.43)                                        | 1.18 (0.89-1.56) | 1.10 (0.96-1.26)                                                                       | 0.95 (0.80-1.12) | <b>1.17 (1.06-1.30)</b>                                                                | 0.89 (0.69-1.15) |
| 1-3 Times/Month vs. Rarely/Never                                                                 | 1.10 (0.97-1.25)                                    | 1.04 (0.85-1.26) | 1.24 (0.99-1.55)                                        | 1.07 (0.77-1.49) | 0.97 (0.82-1.14)                                                                       | 1.11 (0.94-1.30) | 1.06 (0.93-1.22)                                                                       | 1.18 (0.90-1.54) |
| Latent Classes                                                                                   |                                                     |                  |                                                         |                  |                                                                                        |                  |                                                                                        |                  |
| Class 3 vs. Class 1                                                                              | 1.12 (0.99-1.27)                                    | 1.04 (0.88-1.24) | <b>1.43 (1.11-1.85)</b>                                 | 1.03 (0.76-1.38) | 0.93 (0.79-1.09)                                                                       | 1.03 (0.86-1.24) | 1.08 (0.95-1.23)                                                                       | 1.02 (0.78-1.34) |
| Class 2 vs. Class 1                                                                              | 1.11 (0.98-1.27)                                    | 1.04 (0.88-1.23) | <b>1.34 (1.04-1.73)</b>                                 | 0.94 (0.69-1.27) | 0.91 (0.79-1.06)                                                                       | 1.15 (0.97-1.36) | 1.01 (0.88-1.16)                                                                       | 1.10 (0.87-1.39) |

Models are adjusted for sociodemographic factors (age, educational attainment, household income, employment status, marital status), health behaviors and characteristics (smoking status, alcohol usage, body mass index), and enjoyment of PA.

Bolded values indicate statistical significance at a two-sided p-value < 0.05.

Class 1: High Styling Product Use/ Low Use Other Products

Class 2: High Styling Product Use/ Medium Shampoo & Conditioners

Class 3: High Styling Product, Growth/Moisturizing Product, and Shampoo Use

Abbreviations: CI (Confidence Interval); PA (physical activity)

Missing values: educational attainment= 1; household income= 3

\* 118 of the 1,558 participants were lost to follow-up and did not provide adulthood PA data.

\*\* Percentage of time spent engaging in intense PA was assessed among the 817 participants who engaged in any minutes of PA per week, on average.

Note: No interaction terms had a two-sided p-value <0.10.

Supplemental Table S7. Prevalence ratios for engagement in physical activity (PA) for participants by chemical hair product use or latent class of hair maintenance behaviors in the past 12 months, stratified by age group: Participants with more hair product use/hair maintenance compared to participants with less hair product use/hair maintenance, Study of Environment, Lifestyle and Fibroids (N=1,440\*)

| Chemical Hair Product OR<br>Latent Classes of<br>Hair Maintenance Behaviors/<br>Hair Product Use | Age Group                                                          |                      |                                                                       |                      |                                                                                        |                      |                                                                                        |                      |
|--------------------------------------------------------------------------------------------------|--------------------------------------------------------------------|----------------------|-----------------------------------------------------------------------|----------------------|----------------------------------------------------------------------------------------|----------------------|----------------------------------------------------------------------------------------|----------------------|
|                                                                                                  | <33 Years<br>(n=702)                                               | ≥33 Years<br>(n=738) | <33 Years<br>(n=702)                                                  | ≥33 Years<br>(n=738) | <33 Years<br>(n=239)                                                                   | ≥33 Years<br>(n=231) | <33 Years<br>(n=217)                                                                   | ≥33 Years<br>(n=236) |
|                                                                                                  | Prevalence Ratio (95% CI)                                          |                      |                                                                       |                      |                                                                                        |                      |                                                                                        |                      |
|                                                                                                  | Participation in<br>Leisure-time PA<br>(Yes vs. No) <sup>LIC</sup> |                      | ≥150 Minutes/Week of<br>Leisure-time PA<br>(Yes vs. No) <sup>CR</sup> |                      | Percentage of Time Spent<br>Engaging in Intense PA **<br>(≤ Half vs. Very Little/None) |                      | Percentage of Time Spent<br>Engaging in Intense PA **<br>(> Half vs. Very Little/None) |                      |
| <b>Chemical Relaxer</b>                                                                          |                                                                    |                      |                                                                       |                      |                                                                                        |                      |                                                                                        |                      |
| ≥ Twice/Year vs. Rarely/Never                                                                    | 0.95 (0.82-1.09)                                                   | 0.86 (0.75-0.99)     | 1.13 (0.89-1.43)                                                      | 0.71 (0.53-0.93)     | 1.01 (0.88-1.16)                                                                       | 1.00 (0.85-1.18)     | 0.86 (0.71-1.05)                                                                       | 0.95 (0.81-1.12)     |
| Once/Year vs. Rarely/Never                                                                       | 0.98 (0.81-1.19)                                                   | 1.04 (0.87-1.26)     | 1.07 (0.77-1.49)                                                      | 1.20 (0.86-1.67)     | 1.03 (0.83-1.28)                                                                       | 1.17 (0.97-1.41)     | 1.06 (0.84-1.35)                                                                       | 0.96 (0.74-1.23)     |
| <b>Leave-in Conditioner</b>                                                                      |                                                                    |                      |                                                                       |                      |                                                                                        |                      |                                                                                        |                      |
| ≥Once/Week vs. Rarely/Never                                                                      | 1.09 (0.95-1.26)                                                   | 1.06 (0.94-1.21)     | 0.92 (0.71-1.19)                                                      | 1.36 (1.06-1.73)     | 1.04 (0.91-1.20)                                                                       | 1.06 (0.91-1.24)     | 1.03 (0.89-1.19)                                                                       | 1.14 (1.00-1.30)     |
| 1-3 Times/Month vs. Rarely/Never                                                                 | <b>1.21 (1.05-1.39)</b>                                            | 0.96 (0.82-1.13)     | 1.09 (0.85-1.39)                                                      | 1.24 (0.92-1.66)     | 1.01 (0.87-1.17)                                                                       | 1.02 (0.84-1.24)     | 1.05 (0.89-1.25)                                                                       | 1.07 (0.89-1.27)     |
| <b>Latent Classes</b>                                                                            |                                                                    |                      |                                                                       |                      |                                                                                        |                      |                                                                                        |                      |
| Class 3 vs. Class 1                                                                              | 1.15 (0.99-1.34)                                                   | 1.04 (0.91-1.19)     | 1.20 (0.92-1.57)                                                      | 1.25 (0.96-1.63)     | 1.04 (0.89-1.22)                                                                       | 0.92 (0.76-1.11)     | 1.10 (0.92-1.31)                                                                       | 1.05 (0.90-1.23)     |
| Class 2 vs. Class 1                                                                              | <b>1.22 (1.05-1.42)</b>                                            | 0.98 (0.85-1.13)     | 1.15 (0.88-1.50)                                                      | 1.08 (0.82-1.44)     | 0.99 (0.84-1.18)                                                                       | 1.02 (0.87-1.18)     | 1.03 (0.86-1.22)                                                                       | 1.00 (0.85-1.18)     |

Models are adjusted for sociodemographic factors (age [years], educational attainment, household income, employment status, marital status), health behaviors and characteristics (smoking status, alcohol usage, body mass index category), and enjoyment of PA.

Bolded values indicate statistical significance at a two-sided p-value < 0.05.

Class 1: High Styling Product Use/ Low Use Other Products

Class 2: High Styling Product Use/ Medium Shampoo & Conditioners

Class 3: High Styling Product, Growth/Moisturizing Product, and Shampoo Use

Abbreviations: CI (Confidence Interval); PA (physical activity)

Missing values: educational attainment= 1; household income= 3

\* 118 of the 1,558 participants were lost to follow-up and did not provide adulthood PA data.

\*\* Percentage of time spent engaging in intense PA was assessed among the 817 participants who engaged in any minutes of PA per week, on average.

<sup>LIC</sup> Interaction term for leave-in conditioner\*age group two-sided p-value <0.10.

<sup>CR</sup> Interaction term for chemical relaxer\*age group two-sided p-value <0.05.

Supplemental Table S8. Prevalence ratios for engagement in physical activity (PA) for participants by chemical hair product use or latent class of hair maintenance behaviors in the past 12 months, stratified by annual household income: Participants with more hair product use/hair maintenance compared to participants with less hair product use/hair maintenance, Study of Environment, Lifestyle and Fibroids (N=1,440\*)

| Chemical Hair Product OR<br>Latent Classes of<br>Hair Maintenance Behaviors/<br>Hair Product Use | Annual Household Income                             |                         |                                                         |                      |                                                                                        |                         |                                                                                        |                      |
|--------------------------------------------------------------------------------------------------|-----------------------------------------------------|-------------------------|---------------------------------------------------------|----------------------|----------------------------------------------------------------------------------------|-------------------------|----------------------------------------------------------------------------------------|----------------------|
|                                                                                                  | ≤\$50,000<br>(n=1,074)                              | >\$50,000<br>(n=364)    | ≤\$50,000<br>(n=1,074)                                  | >\$50,000<br>(n=364) | ≤\$50,000<br>(n=357)                                                                   | >\$50,000<br>(n=113)    | ≤\$50,000<br>(n=300)                                                                   | >\$50,000<br>(n=153) |
|                                                                                                  | Prevalence Ratio (95% CI)                           |                         |                                                         |                      |                                                                                        |                         |                                                                                        |                      |
|                                                                                                  | Participation in<br>Leisure-time PA<br>(Yes vs. No) |                         | ≥150 Minutes/Week of<br>Leisure-time PA<br>(Yes vs. No) |                      | Percentage of Time Spent<br>Engaging in Intense PA **<br>(≤ Half vs. Very Little/None) |                         | Percentage of Time Spent<br>Engaging in Intense PA **<br>(> Half vs. Very Little/None) |                      |
| Chemical Relaxer                                                                                 |                                                     |                         |                                                         |                      |                                                                                        |                         |                                                                                        |                      |
| ≥ Twice/Year vs. Rarely/Never                                                                    | 0.89 (0.79-1.01)                                    | 0.92 (0.78-1.08)        | 0.86 (0.69-1.07)                                        | 0.94 (0.69-1.29)     | 0.97 (0.85-1.11)                                                                       | 1.06 (0.91-1.24)        | <b>0.81 (0.67-0.98)</b>                                                                | 1.02 (0.88-1.18)     |
| Once/Year vs. Rarely/Never                                                                       | 0.97 (0.84-1.14)                                    | 1.06 (0.83-1.36)        | 0.96 (0.74-1.25)                                        | 1.48 (0.92-2.38)     | 1.06 (0.90-1.26)                                                                       | <b>1.22 (1.03-1.44)</b> | 0.93 (0.74-1.18)                                                                       | 1.10 (0.98-1.25)     |
| Leave-in Conditioner                                                                             |                                                     |                         |                                                         |                      |                                                                                        |                         |                                                                                        |                      |
| ≥Once/Week vs. Rarely/Never                                                                      | 1.02 (0.90-1.15)                                    | <b>1.23 (1.07-1.41)</b> | 1.12 (0.90-1.39)                                        | 1.20 (0.88-1.63)     | 1.04 (0.90-1.20)                                                                       | 0.98 (0.86-1.12)        | 1.16 (1.00-1.35)                                                                       | 1.02 (0.91-1.14)     |
| 1-3 Times/Month vs. Rarely/Never                                                                 | 1.09 (0.96-1.25)                                    | 1.11 (0.94-1.31)        | 1.20 (0.95-1.52)                                        | 1.22 (0.90-1.66)     | 1.06 (0.92-1.22)                                                                       | 0.89 (0.73-1.10)        | 1.15 (0.96-1.38)                                                                       | 0.94 (0.81-1.08)     |
| Latent Classes                                                                                   |                                                     |                         |                                                         |                      |                                                                                        |                         |                                                                                        |                      |
| Class 3 vs. Class 1                                                                              | 1.09 (0.95-1.24)                                    | 1.08 (0.93-1.27)        | 1.35 (1.07-1.69)                                        | 1.00 (0.72-1.40)     | 1.02 (0.88-1.19)                                                                       | 0.90 (0.77-1.06)        | 1.17 (0.99-1.40)                                                                       | 0.92 (0.82-1.04)     |
| Class 2 vs. Class 1                                                                              | 1.14 (1.00-1.29)                                    | 0.98 (0.83-1.16)        | 1.25 (0.99-1.59)                                        | 0.98 (0.71-1.35)     | 1.05 (0.91-1.20)                                                                       | 0.93 (0.80-1.08)        | 1.06 (0.89-1.28)                                                                       | 0.94 (0.84-1.06)     |

Models are adjusted for sociodemographic factors (age, educational attainment, employment status, marital status), health behaviors and characteristics (smoking status, alcohol usage, body mass index category, and enjoyment of PA).

Bolded values indicate statistical significance at a two-sided p-value < 0.05.

Class 1: High Styling Product Use/ Low Use Other Products

Class 2: High Styling Product Use/ Medium Shampoo & Conditioners

Class 3: High Styling Product, Growth/Moisturizing Product, and Shampoo Use

Abbreviations: CI (Confidence Interval); PA (physical activity)

Missing values: educational attainment= 1; household income= 3

\* 118 of the 1,558 participants were lost to follow-up and did not provide adulthood PA data.

\*\* Percentage of time spent engaging in intense PA was assessed among the 817 participants who engaged in any minutes of PA per week, on average.

Note: No interaction terms had a two-sided p-value <0.10.

**Supplemental Table S9. Prevalence ratios for engagement in physical activity (PA) for participants by chemical hair product use or latent class of hair maintenance behaviors in the past 12 months, stratified by obesity status: Participants with more hair product use/hair maintenance compared to participants with less hair product use/hair maintenance, Study of Environment, Lifestyle and Fibroids (N=1,440\*)**

| Chemical Hair Product OR<br>Latent Classes of<br>Hair Maintenance Behaviors/<br>Hair Product Use | Obesity Status                                      |                         |                                                         |                  |                                                                                        |                  |                                                                                                      |                         |
|--------------------------------------------------------------------------------------------------|-----------------------------------------------------|-------------------------|---------------------------------------------------------|------------------|----------------------------------------------------------------------------------------|------------------|------------------------------------------------------------------------------------------------------|-------------------------|
|                                                                                                  | Non-Obese<br>(n=504)                                | Obese<br>(n=936)        | Non-Obese<br>(n=504)                                    | Obese<br>(n=936) | Non-Obese<br>(n=178)                                                                   | Obese<br>(n=292) | Non-Obese<br>(n=155)                                                                                 | Obese<br>(n=298)        |
|                                                                                                  | Prevalence Ratio (95% CI)                           |                         |                                                         |                  |                                                                                        |                  |                                                                                                      |                         |
|                                                                                                  | Participation in<br>Leisure-time PA<br>(Yes vs. No) |                         | ≥150 Minutes/Week of<br>Leisure-time PA<br>(Yes vs. No) |                  | Percentage of Time Spent<br>Engaging in Intense PA **<br>(≤ Half vs. Very Little/None) |                  | Percentage of Time Spent<br>Engaging in Intense PA **<br>(> Half vs. Very Little/None) <sup>LC</sup> |                         |
| <b>Chemical Relaxer</b>                                                                          |                                                     |                         |                                                         |                  |                                                                                        |                  |                                                                                                      |                         |
| ≥ Twice/Year vs. Rarely/Never                                                                    | 0.97 (0.82-1.15)                                    | <b>0.87 (0.77-0.98)</b> | 0.99 (0.71-1.38)                                        | 0.88 (0.71-1.09) | 1.14 (0.96-1.35)                                                                       | 0.94 (0.83-1.08) | 1.03 (0.82-1.29)                                                                                     | <b>0.83 (0.71-0.97)</b> |
| Once/Year vs. Rarely/Never                                                                       | 0.88 (0.69-1.12)                                    | 1.05 (0.90-1.24)        | 0.84 (0.53-1.32)                                        | 1.18 (0.90-1.56) | 1.12 (0.86-1.47)                                                                       | 1.06 (0.90-1.25) | 1.05 (0.75-1.46)                                                                                     | 1.01 (0.83-1.23)        |
| <b>Leave-in Conditioner</b>                                                                      |                                                     |                         |                                                         |                  |                                                                                        |                  |                                                                                                      |                         |
| ≥Once/Week vs. Rarely/Never                                                                      | <b>1.20 (1.03-1.41)</b>                             | 1.02 (0.90-1.15)        | 1.30 (0.96-1.76)                                        | 1.07 (0.86-1.33) | 1.07 (0.91-1.25)                                                                       | 1.00 (0.87-1.14) | 1.20 (1.00-1.43)                                                                                     | 1.03 (0.92-1.15)        |
| 1-3 Times/Month vs. Rarely/Never                                                                 | <b>1.19 (1.01-1.42)</b>                             | 1.03 (0.91-1.18)        | <b>1.48 (1.07-2.04)</b>                                 | 1.06 (0.84-1.34) | 1.04 (0.84-1.30)                                                                       | 0.98 (0.85-1.12) | 1.04 (0.83-1.30)                                                                                     | 1.04 (0.90-1.20)        |
| <b>Latent Classes</b>                                                                            |                                                     |                         |                                                         |                  |                                                                                        |                  |                                                                                                      |                         |
| Class 3 vs. Class 1                                                                              | 1.17 (0.99-1.38)                                    | 1.04 (0.91-1.18)        | <b>1.48 (1.07-2.05)</b>                                 | 1.12 (0.89-1.41) | 1.10 (0.91-1.32)                                                                       | 0.92 (0.79-1.06) | 1.22 (0.96-1.55)                                                                                     | 0.97 (0.85-1.10)        |
| Class 2 vs. Class 1                                                                              | 1.08 (0.91-1.28)                                    | 1.09 (0.96-1.24)        | 1.19 (0.84-1.68)                                        | 1.12 (0.89-1.41) | 1.04 (0.85-1.28)                                                                       | 0.98 (0.86-1.12) | 1.02 (0.78-1.33)                                                                                     | 0.99 (0.88-1.12)        |

Models are adjusted for sociodemographic factors (age, educational attainment, household income, employment status, marital status), health behaviors and characteristics (smoking status, alcohol usage) and enjoyment of PA.

Bolded values indicate statistical significance at a two-sided p-value < 0.05.

Class 1: High Styling Product Use/ Low Use Other Products

Class 2: High Styling Product Use/ Medium Shampoo & Conditioners

Class 3: High Styling Product, Growth/Moisturizing Product, and Shampoo Use

Abbreviations: CI (Confidence Interval); PA (physical activity)

Missing values: educational attainment= 1; household income= 3

\* 118 of the 1,558 participants were lost to follow-up and did not provide adulthood PA data.

\*\* Percentage of time spent engaging in intense PA was assessed among the 817 participants who engaged in any minutes of PA per week, on average.

<sup>LC</sup> Interaction term for latent class\*age group two-sided p-value <0.10.
